# Supplementary material for: Structural modification of salt-promoted MgO sorbents for intermediate temperature CO2capture
Source: Royal Society of Chemistry journal article supplement (doi:10.1039/d2na00213b), 2022-01-01
Supplement: d2na00213b1.pdf [file d2na00213b1.pdf]

*Supporting Information*

Structural modification of salt-promoted MgO  
sorbents for intermediate temperature CO<sub>2</sub> capture

*Dasol Choi<sup>1</sup> and Youngjune Park<sup>1,2,\*</sup>*

<sup>1</sup> School of Earth Sciences and Environmental Engineering, Gwangju Institute of Science and Technology (GIST), 123 Cheomdangwagi-ro, Buk-gu, Gwangju 61005, Republic of Korea

<sup>2</sup> Research Center for Innovative Energy and Carbon Optimized Synthesis for Chemicals (Inn-ECOSysChem), Gwangju Institute of Science and Technology (GIST), 123 Cheomdangwagi-ro, Buk-gu, Gwangju 61005, Republic of Korea

[young@gist.ac.kr](mailto:young@gist.ac.kr)

## Table of Contents

- Fig. S1** Normalized weight profile of MgO/CNT\_Air during combustion under air.
- Fig. S2** SEM and TEM images of pristine MgO sorbents. SEM images of (a) MgO/CNT\_N<sub>2</sub>, (b) MgO/CNT\_Air, (c) MgO samples, and TEM images of (d) MgO/CNT\_N<sub>2</sub>, (e) MgO/CNT\_Air, (f) MgO.
- Fig. S3** TEM-EDX images and mapping data of MgO-based sorbents: (a) MgO/CNT\_N<sub>2</sub>, (b) MgO/CNT\_Air, and (c) MgO
- Fig. S4** Normalized weight profile of MgO/CNT\_N<sub>2</sub> during combustion under air.
- Fig. S5** XRD patterns of MgO/CNT\_Air and MgO after one carbonation-calcination reaction.
- Fig. S6** SEM images of MgO-based sorbents after 30 cycle: (a) MgO/CNT\_N<sub>2</sub>, (b) MgO/CNT\_Air, (c) MgO, and (d) MgO\_HT
- Fig. S7** SEM images of MgO/CNT\_Air: (a) 1<sup>st</sup> carbonation (MgCO<sub>3</sub>), (b) 1<sup>st</sup> calcination, (c) 5<sup>th</sup> calcination, (d) 12<sup>th</sup> calcination, (e) 30<sup>th</sup> calcination, and (f) 100<sup>th</sup> calcination.
- Fig. S8** SEM images of MgO: (a) 1<sup>st</sup> calcination, (b) 12<sup>th</sup> calcination, and (c) 30<sup>th</sup> calcination.
- Fig. S9** BJH adsorption pore distribution of (a) MgO/CNT\_Air and (b) MgO after one carbonation-calcination reaction.
- Fig. S10** CO<sub>2</sub> capture performance of MgO and MgO/CNT\_Air for 30 cycles under reaction condition for preparing BET samples by TG-DSC.

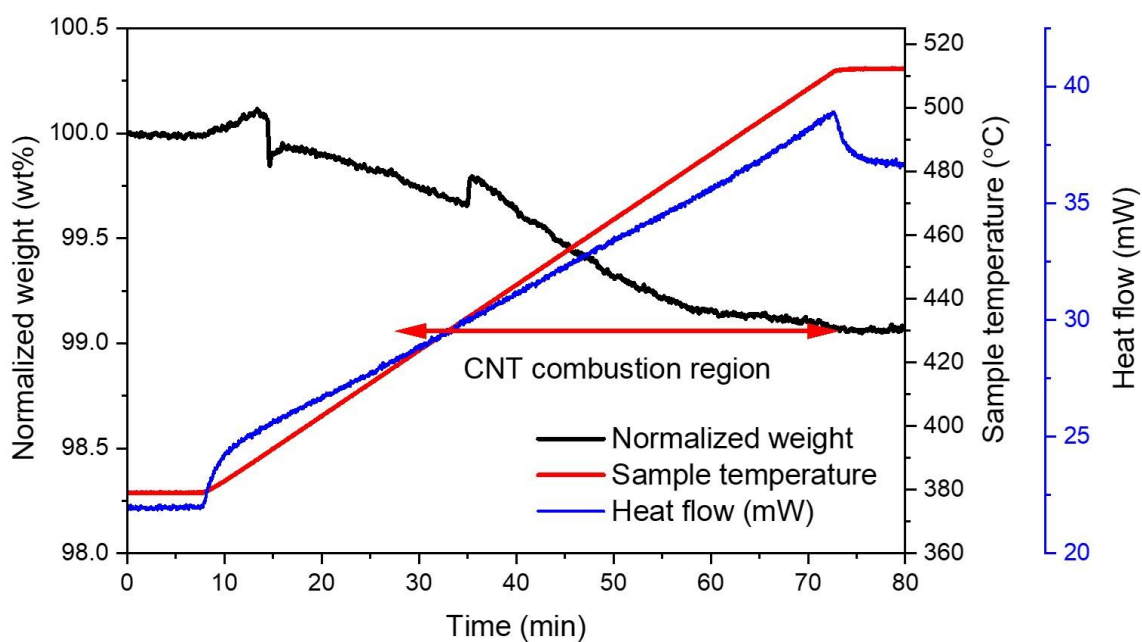

**Fig. S1.** Normalized weight profile of MgO/CNT\_Air during combustion under air.

### Supplementary note 1.

The combustion of CNT should be observed from 410 °C under the air atmosphere. MgO/CNT\_Air sample had ~ 0.7 wt% of weight decrement and the heat flow of CNT combustion was not observed. In addition, the decomposition of alkali metal salt was observed in MgO/CNT\_N<sub>2</sub> sample (in Fig. S5) when there is a residual CNT which was not observed with MgO/CNT\_Air sample. Therefore, the decrement is suspected not to the decomposition of residual CNT and the residual CNT in MgO/CNT\_Air is negligible.

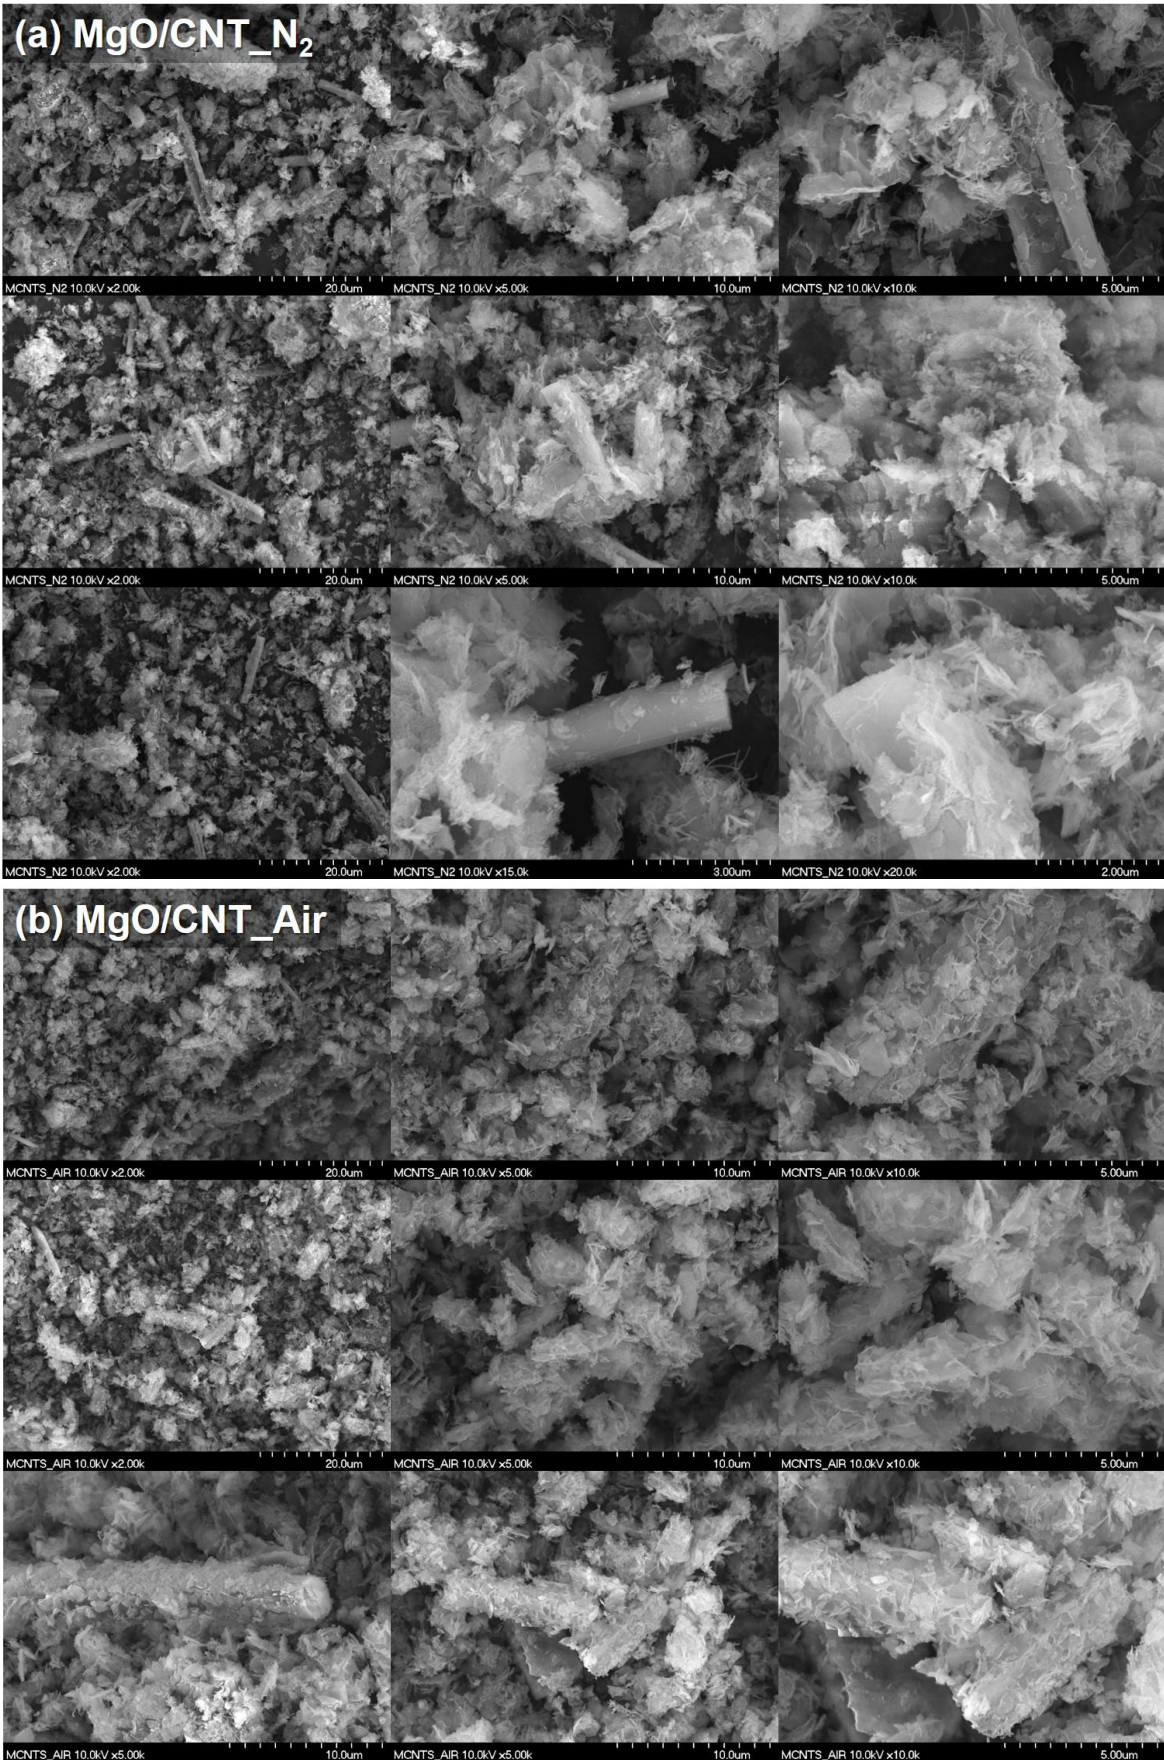



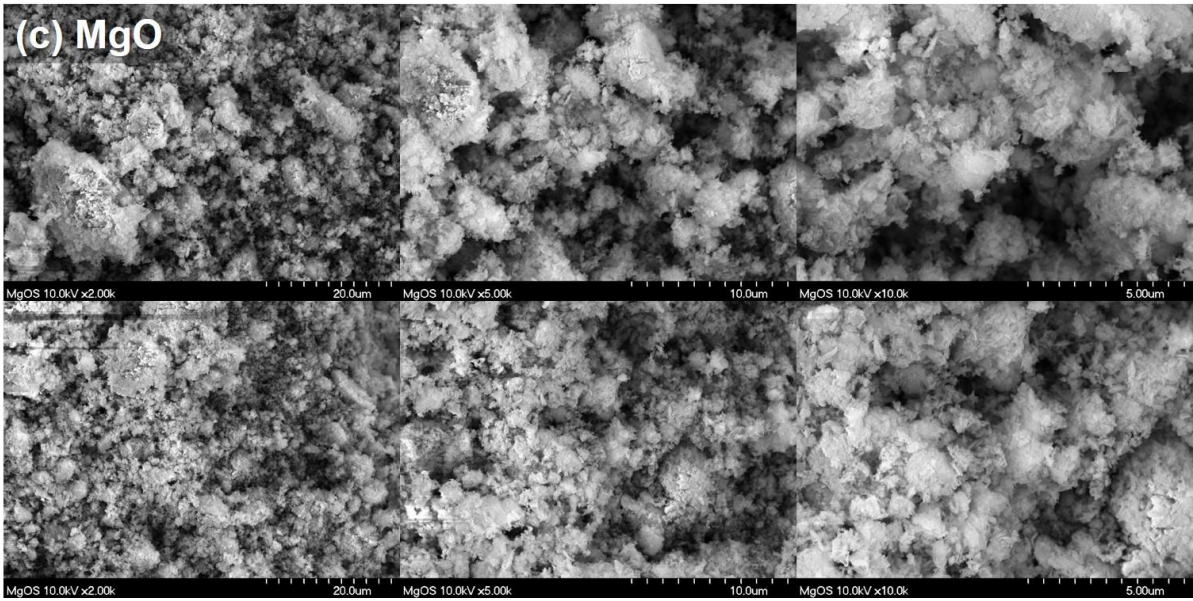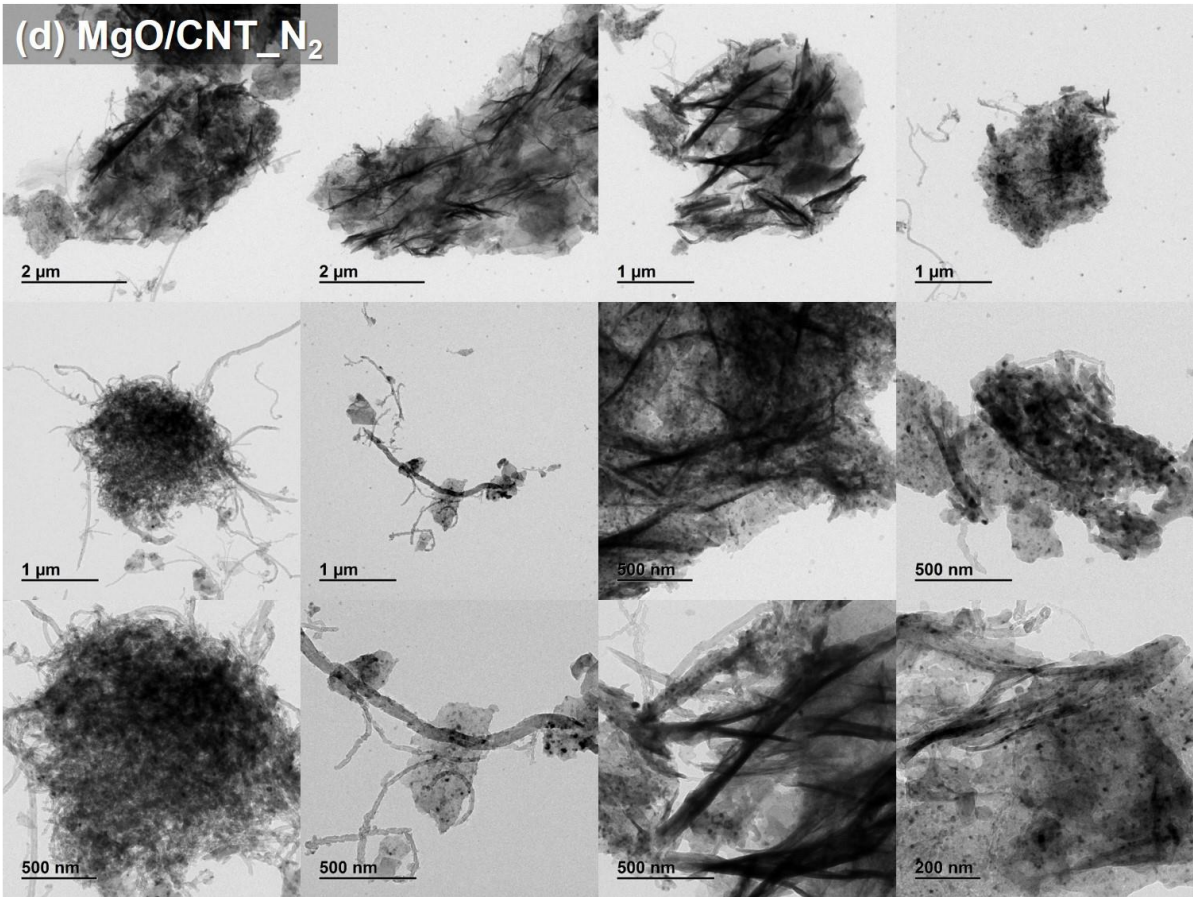



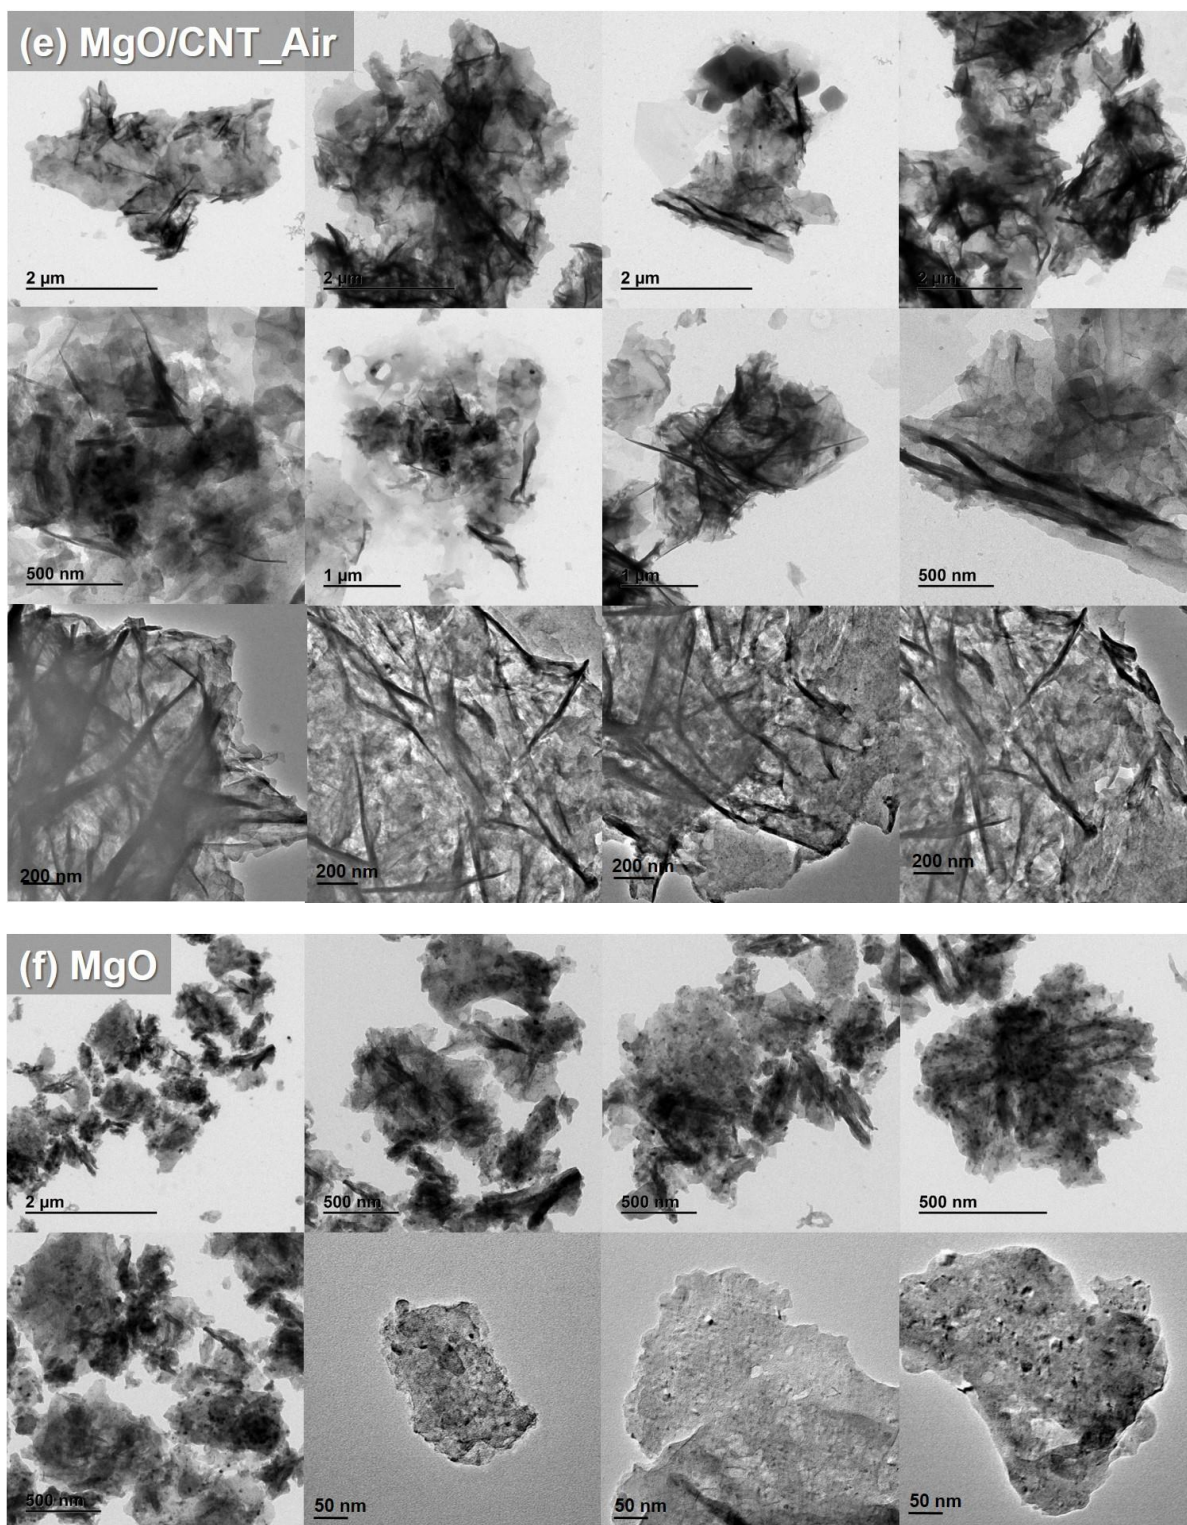

**Fig. S2.** SEM and TEM images of pristine MgO sorbents. SEM images of (a) MgO/CNT\_N<sub>2</sub>, (b) MgO/CNT\_Air, (c) MgO, and TEM images of (d) MgO/CNT\_N<sub>2</sub>, (e) MgO/CNT\_Air, and (f) MgO.



(a) MgO/CNT\_N<sub>2</sub>

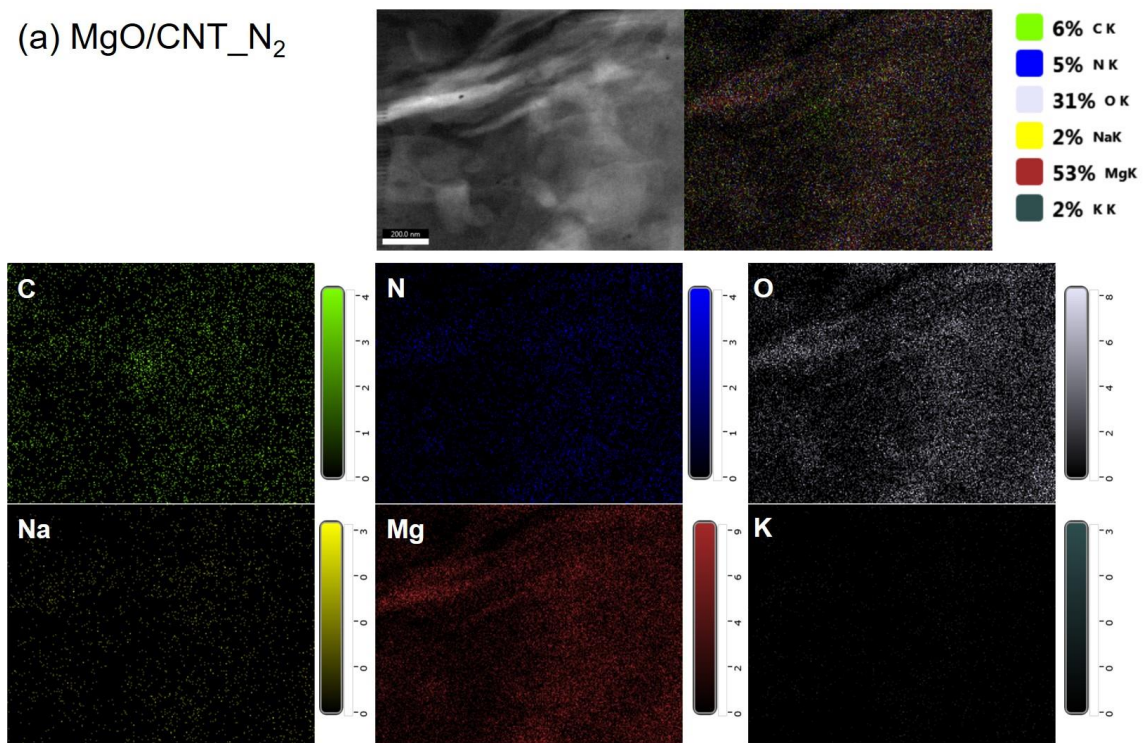

(b) MgO/CNT\_Air

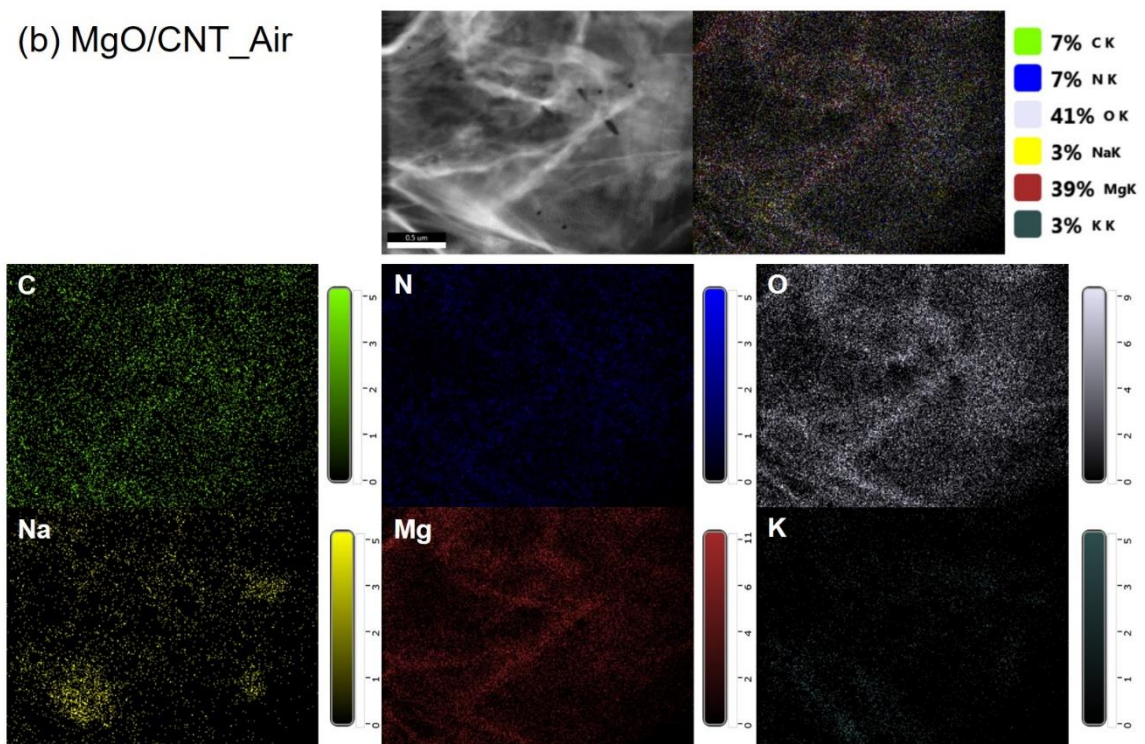

(c) MgO

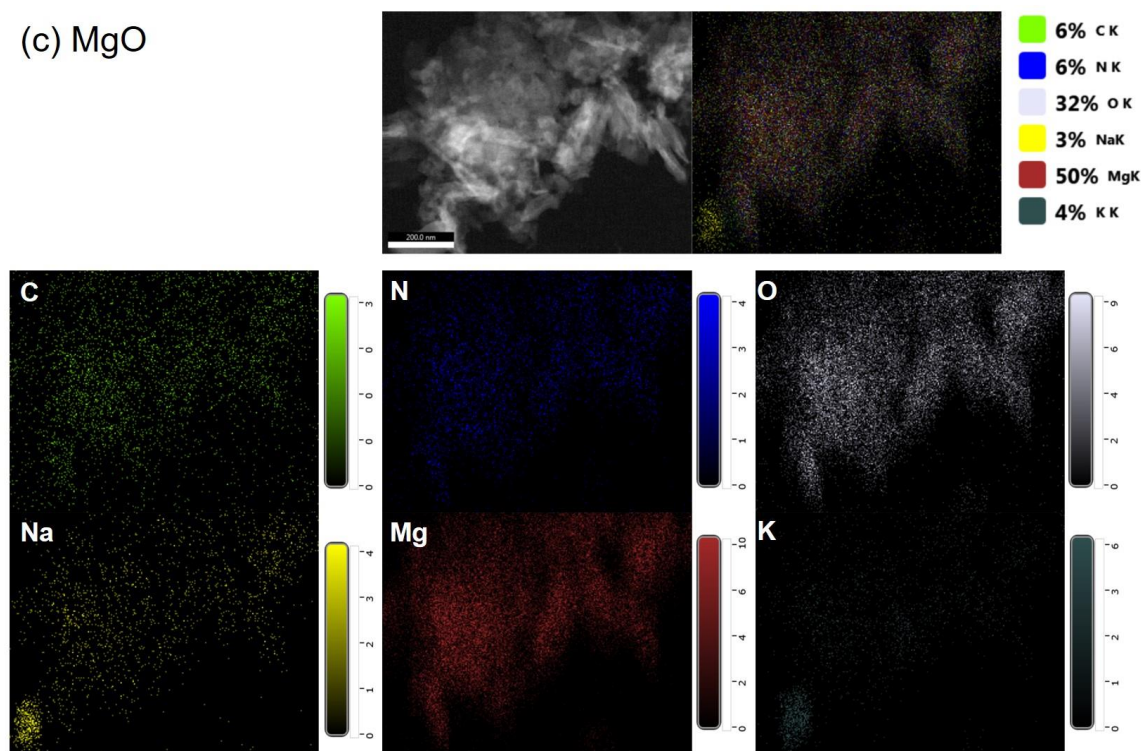

**Fig. S3.** TEM-EDX images and mapping data of MgO-based sorbents: (a) MgO/CNT<sub>N<sub>2</sub></sub>, (b) MgO/CNT<sub>Air</sub>, and (c) MgO



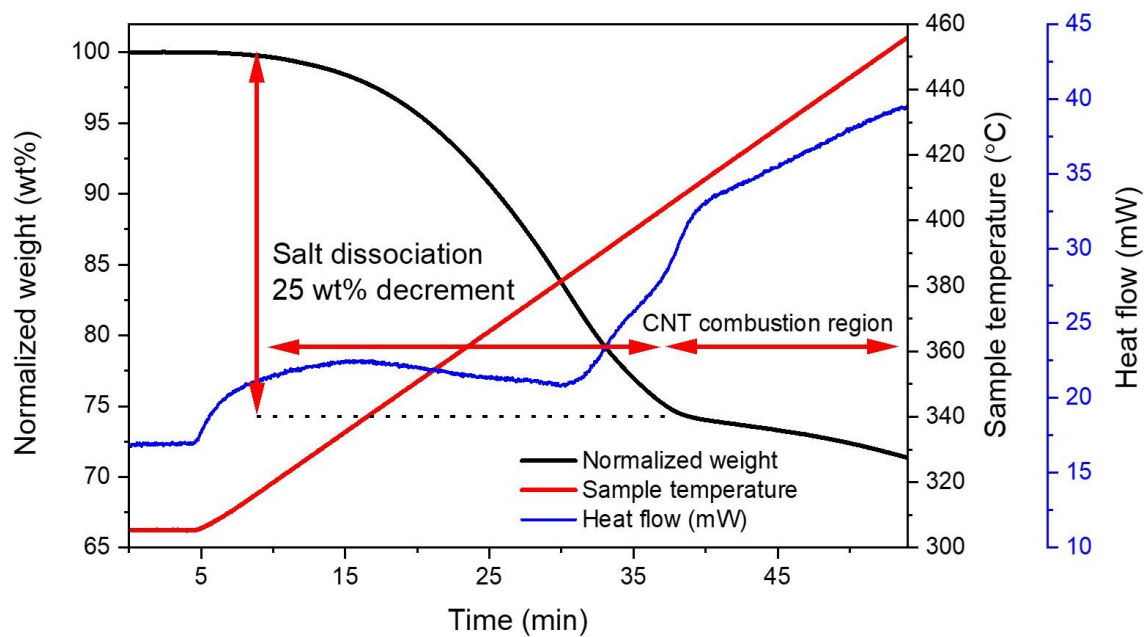

**Fig. S4.** Normalized weight profile of MgO/CNT\_N<sub>2</sub> during combustion under air.

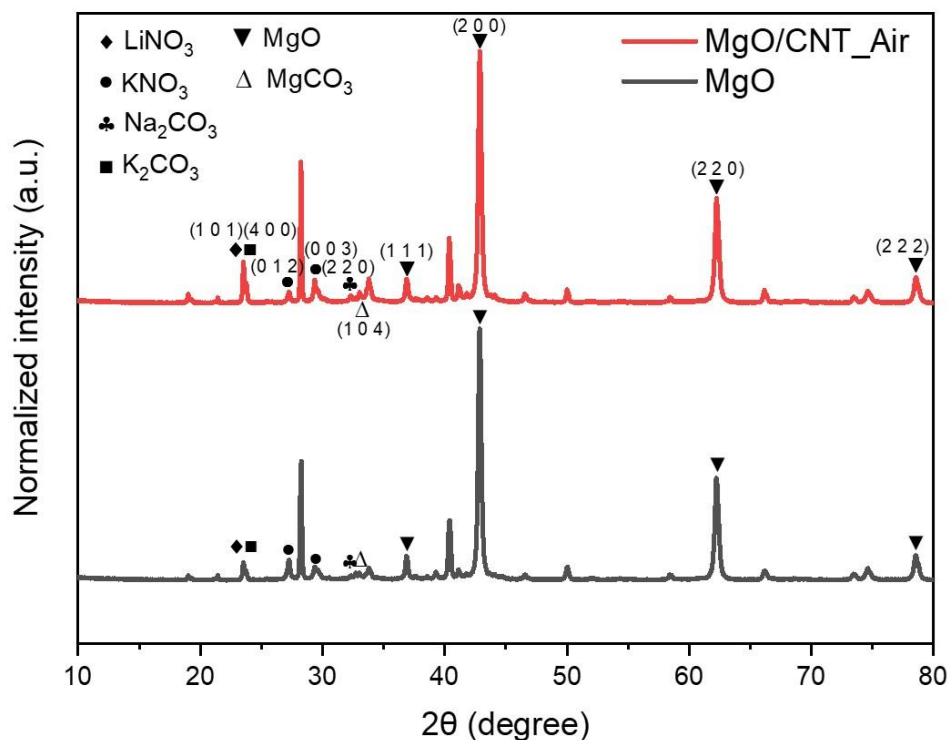

**Fig. S5.** XRD patterns of MgO/CNT\_Air and MgO after one carbonation-calcination reaction.

### Supplementary Note 2.

MgO peaks had high intensity, and a small MgCO<sub>3</sub> peak was observed. Preservation of the AMS after reactions was confirmed by observed AMS (LiNO<sub>3</sub>, KNO<sub>3</sub>, Na<sub>2</sub>CO<sub>3</sub>, K<sub>2</sub>CO<sub>3</sub>) peaks. XRD patterns of both samples was not significantly different, which support that the chemical composition of two sample was identical through reactions. The crystallite sizes were calculated using the Scherrer equation. The crystallite sizes of MgO/CNT\_Air and MgO were 25.00 nm and 25.06 nm, respectively. It supports that the morphological difference caused effects of structural modification.





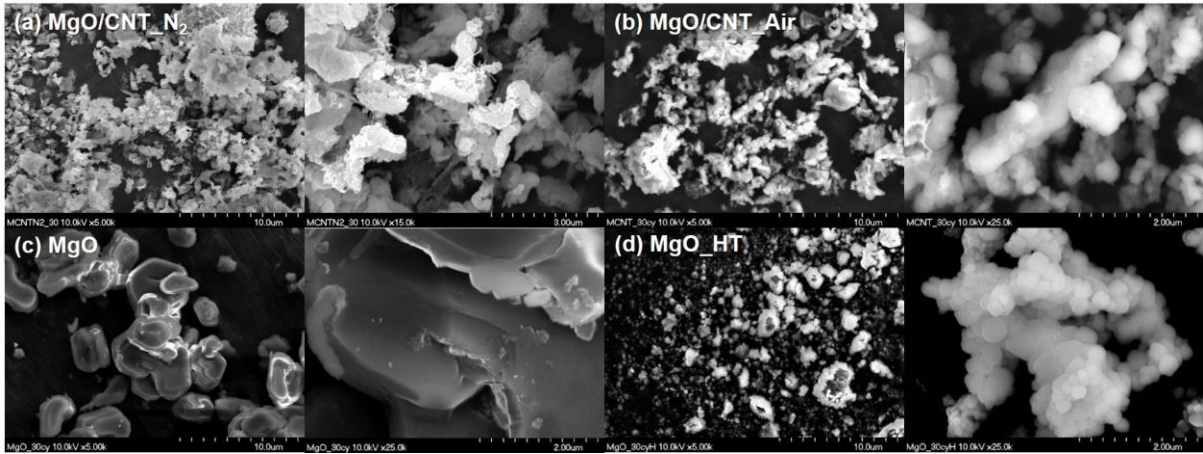

**Fig. S6.** SEM images of MgO-based sorbents after 30 cycle: (a) MgO/CNT\_N<sub>2</sub>, (b) MgO/CNT\_Air, (c) MgO, and (d) MgO\_HT.

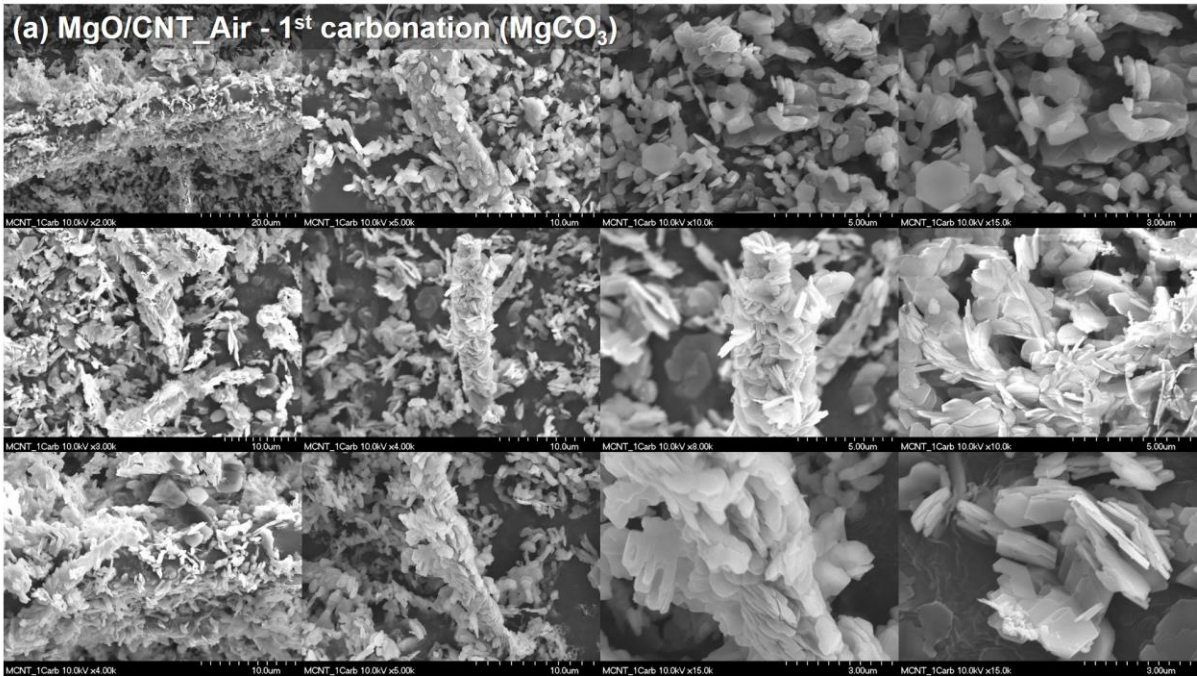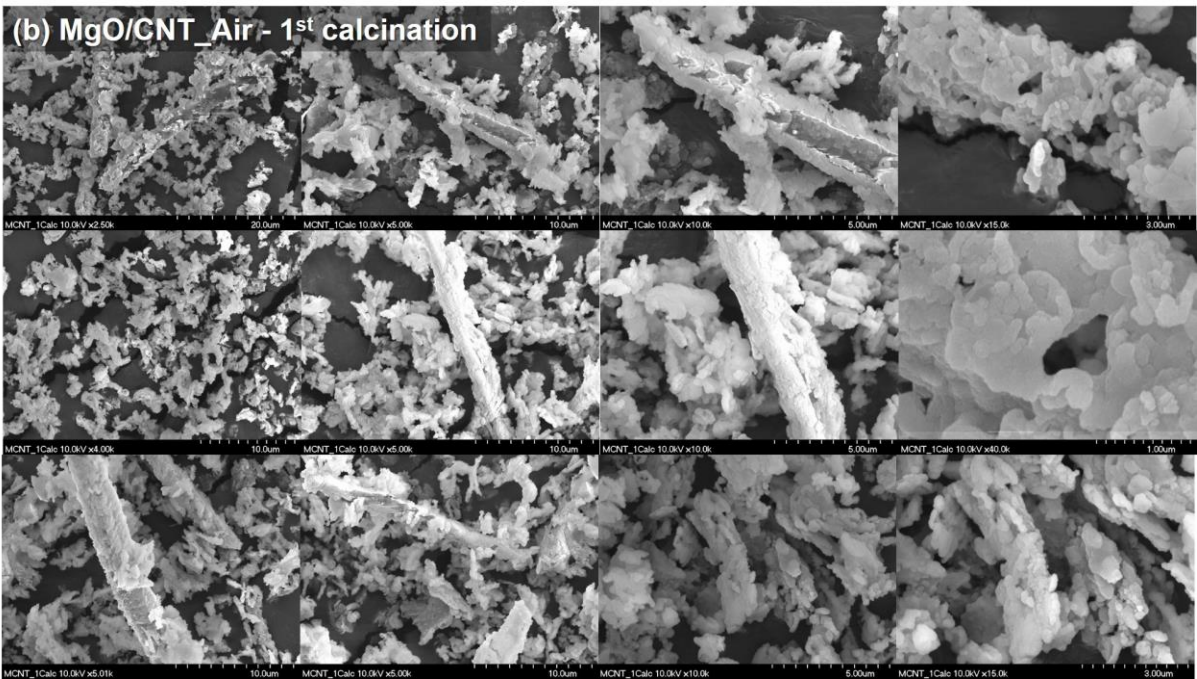



(c) MgO/CNT\_Air – 5<sup>th</sup> calcination

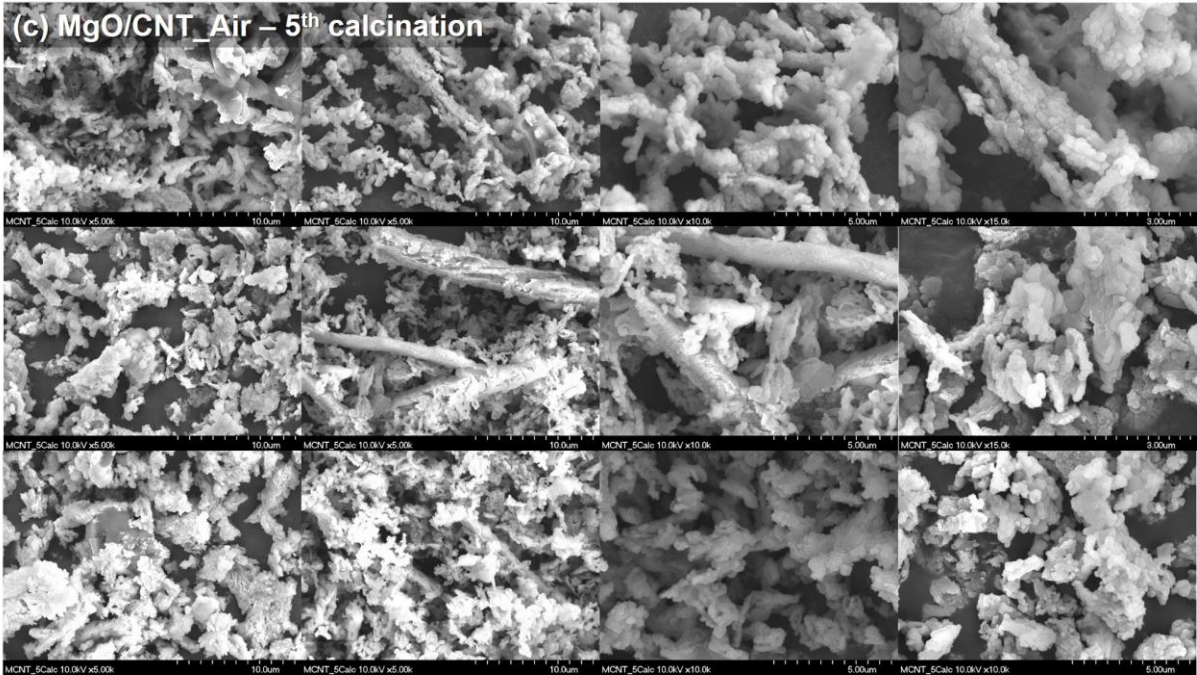

(d) MgO/CNT\_Air – 12<sup>th</sup> calcination

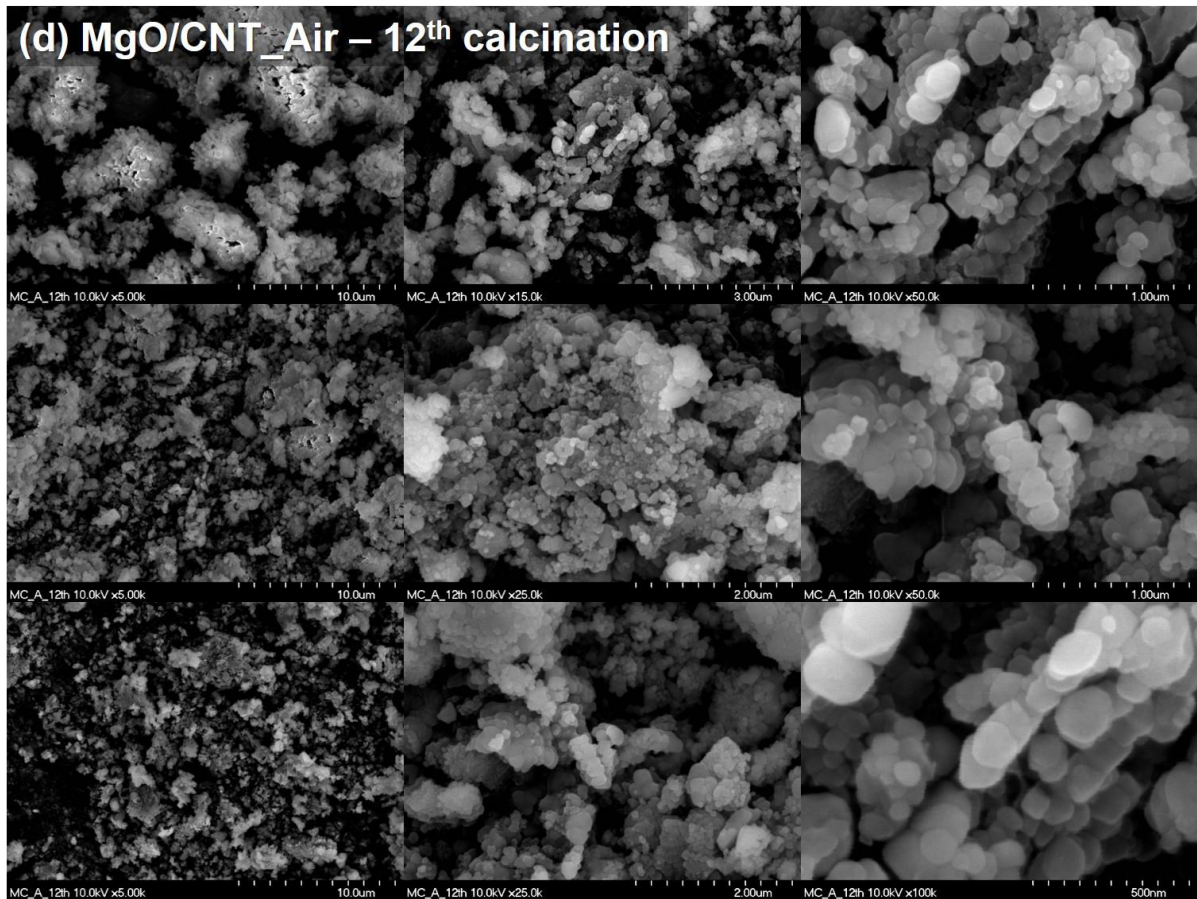



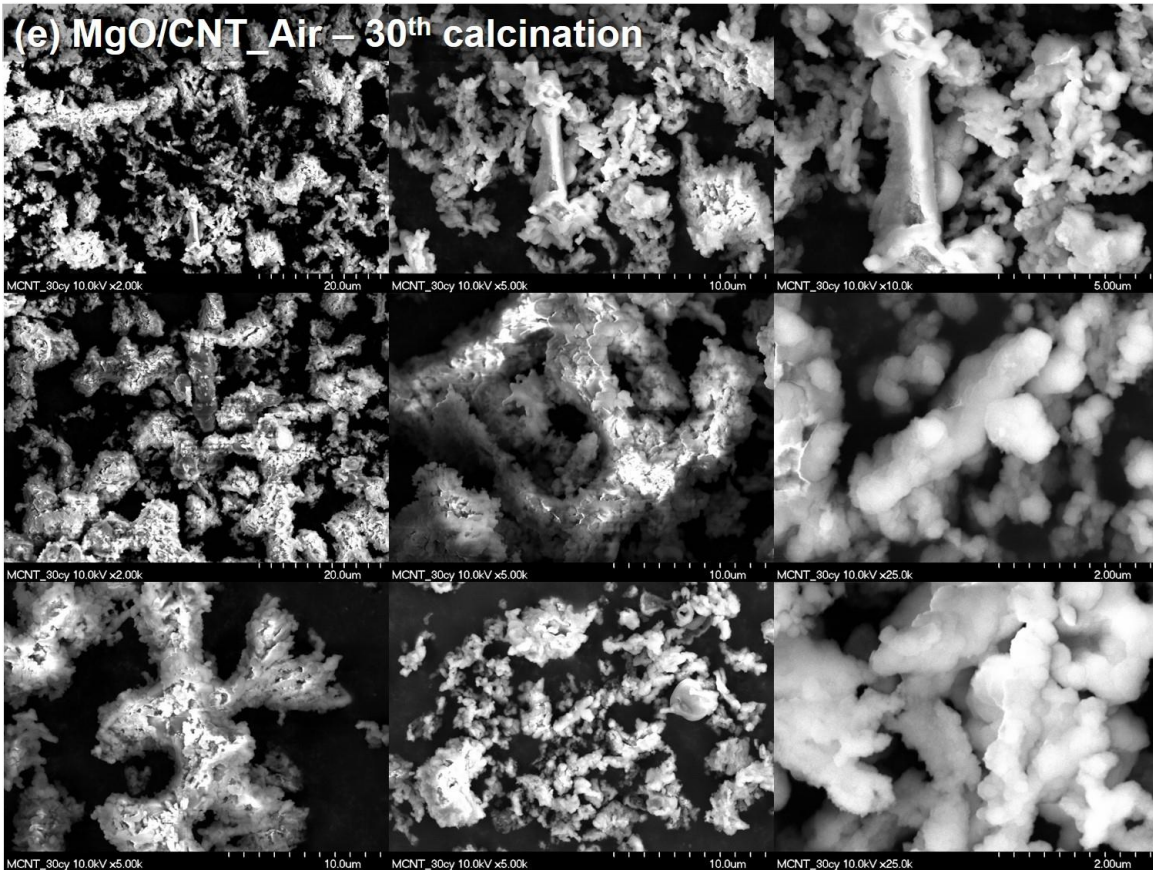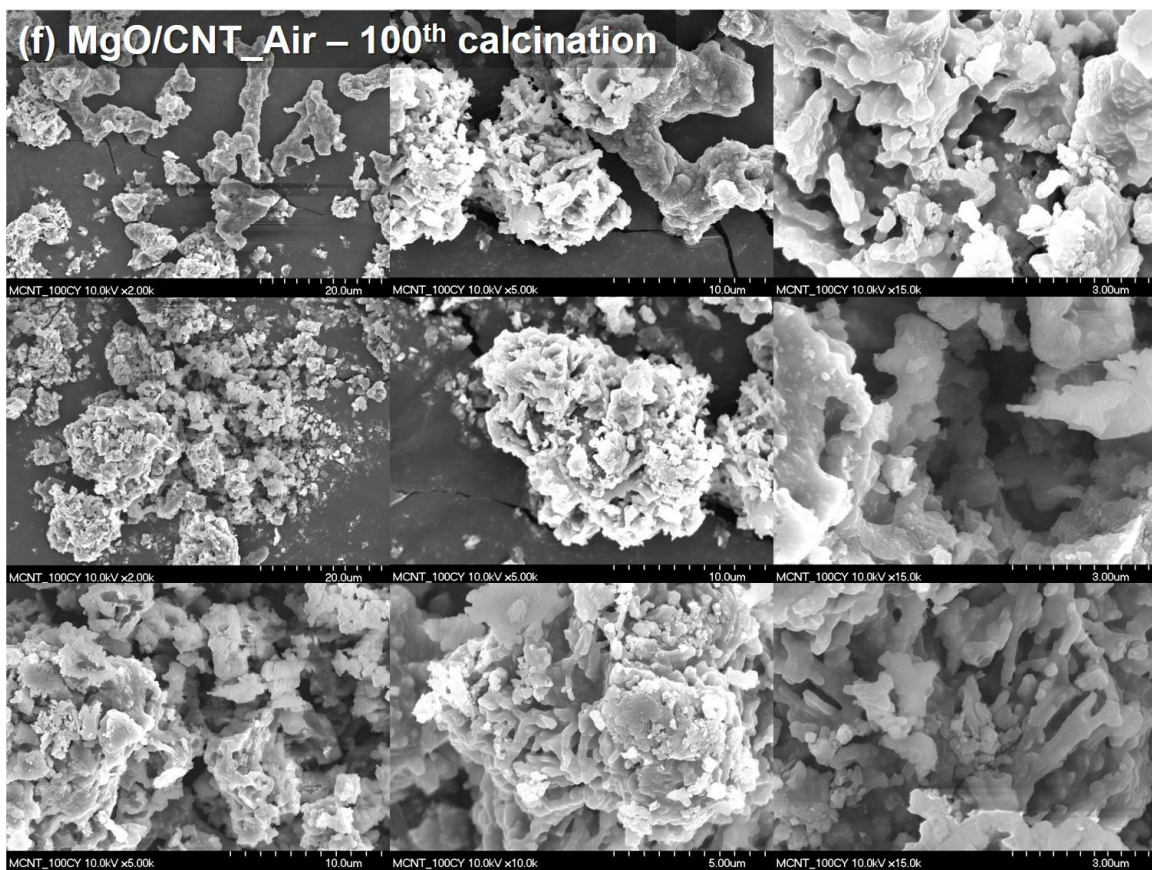

**Fig. S7.** SEM images of MgO/CNT\_Air: (a) 1st carbonation ( $\text{MgCO}_3$ ), (b) 1st calcination, (c) 5th calcination, (d) 12th calcination, (e) 30th calcination, and (f) 100th calcination.



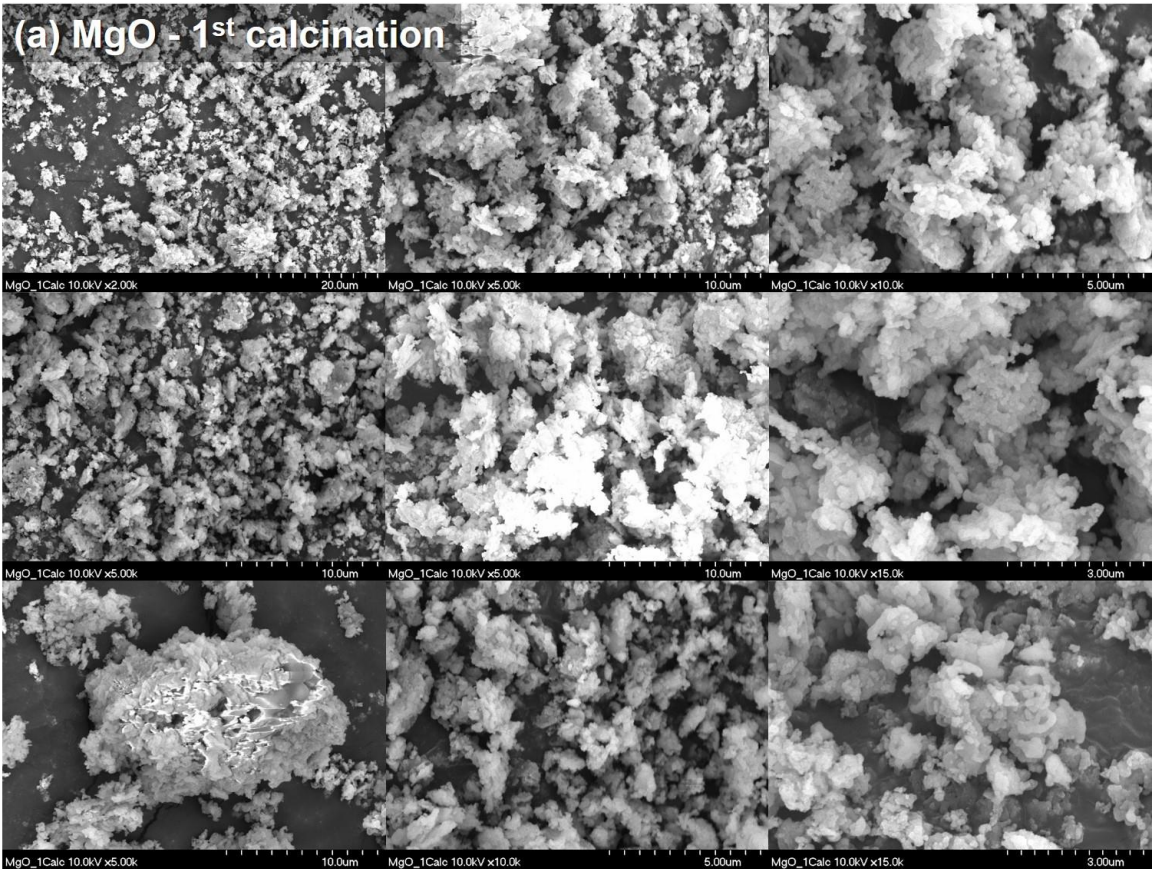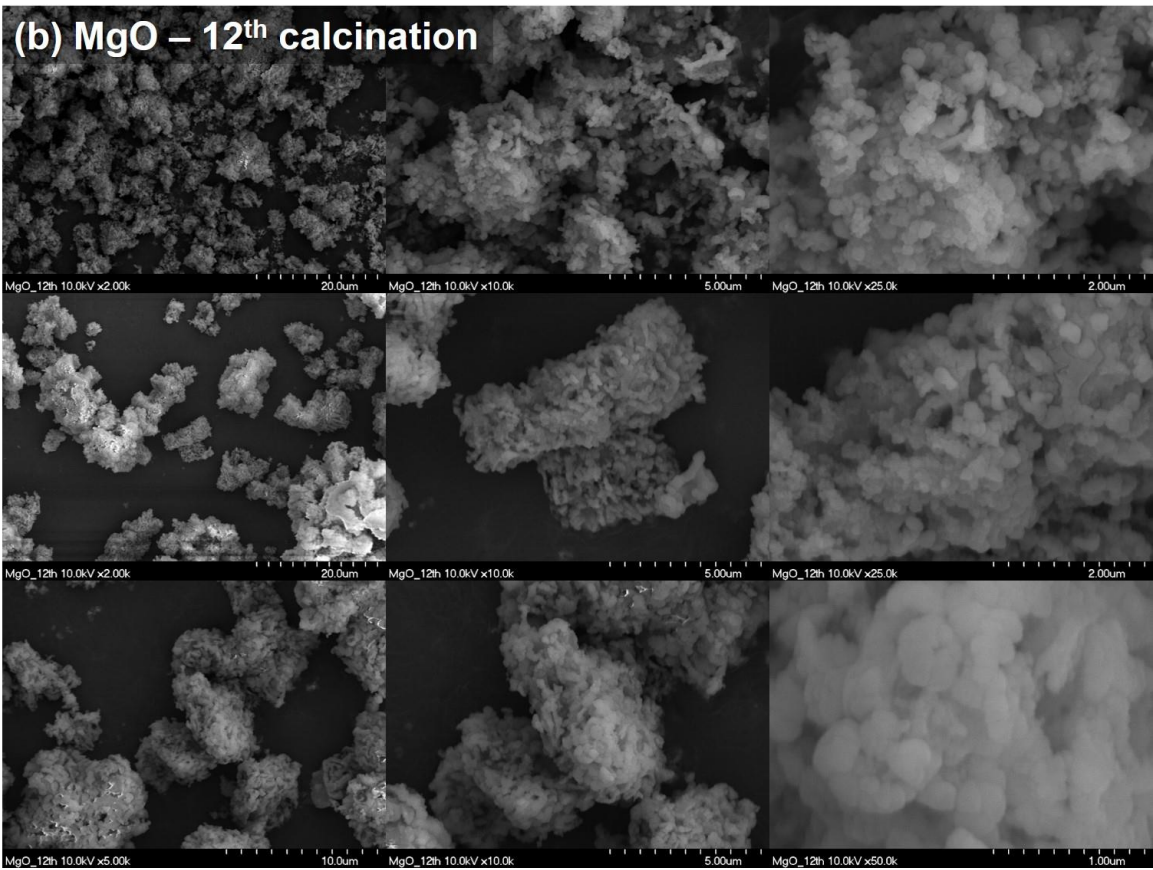



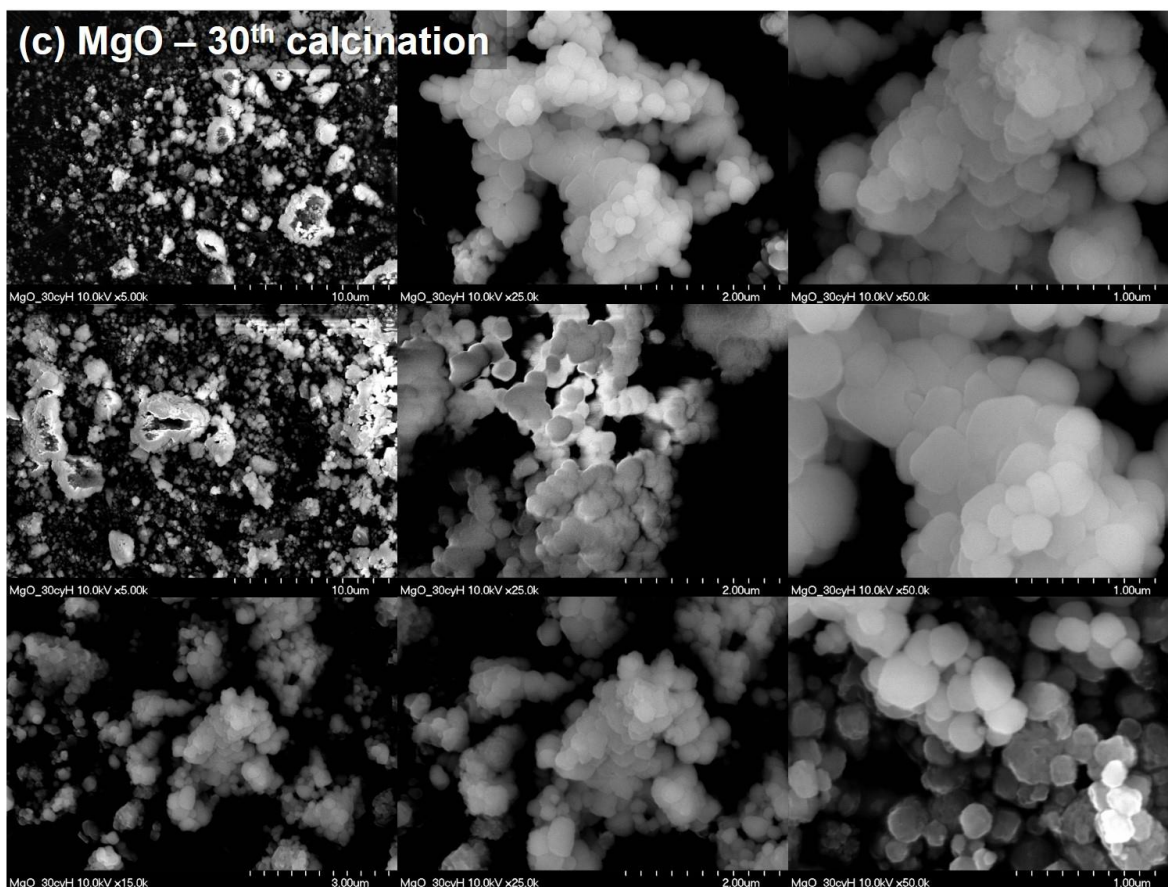

**Fig. S8.** SEM images of MgO: (a) 1<sup>st</sup> calcination, (b) 12<sup>th</sup> calcination, and (c) 30<sup>th</sup> calcination.

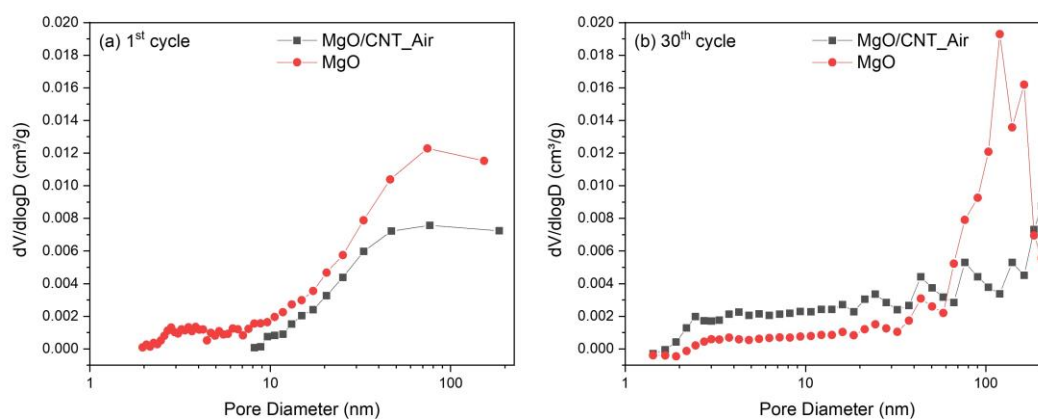

**Fig. S9.** BJH adsorption pore distribution of MgO/CNT\_Air and MgO (a) after one carbonation-calcination reaction, and (b) after 30<sup>th</sup> carbonation-calcination reaction.

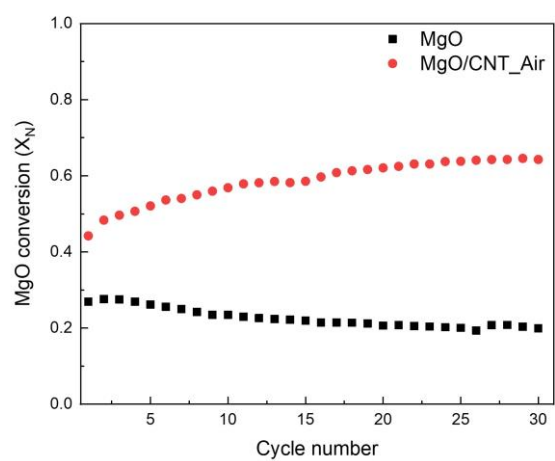

**Fig. S10.** CO<sub>2</sub> capture performance of MgO and MgO/CNT\_Air for 30 cycles under reaction condition for preparing BET samples by TG-DSC.
